# Supplementary material for: Mechanism of glycoside hydrolysis: A comparative QM/MM molecular dynamics analysis for wild type and Y69F mutant retaining xylanases
Source: Royal Society of Chemistry journal article supplement (doi:10.1039/b911644c), 2009-01-01
Supplement: b911644c.pdf [file b911644c.pdf]

# Mechanism of glycoside hydrolysis: A comparative QM/MM molecular dynamics analysis for wild type and Y69F mutant retaining xylanases<sup>†</sup>

Mahmoud E. S. Soliman,<sup>a,b</sup> J. Javier Ruiz Pernía,<sup>a</sup> Ian R. Greig<sup>a</sup> and Ian H. Williams<sup>\*a</sup>

<sup>a</sup> Department of Chemistry, University of Bath, Bath, UK BA2 7AY. Fax: 44 1225 386231; Tel: 44 1225 386625; E-mail: [i.h.williams@bath.ac.uk](mailto:i.h.williams@bath.ac.uk). <sup>b</sup> Department of Pharmaceutical Organic Chemistry, Faculty of Pharmacy, Zagazig University, Zagazig, Egypt.

## Electronic Supplementary Information

Cartesian coordinates (Ångström) for QM atoms of optimised geometries of key stationary structures

**Wild Type BCX:**

**AM1/OPLS optimised geometry for reactant complex RC (QM atoms only,  
including Tyr69)**

|   |              |              |              |
|---|--------------|--------------|--------------|
| 6 | -2.459142130 | 11.798632787 | 3.074310880  |
| 6 | -2.406034800 | 10.945034384 | 4.365699776  |
| 6 | -2.931720575 | 11.786390270 | 5.539138106  |
| 6 | -2.099696449 | 13.081318643 | 5.585141131  |
| 6 | -2.258710667 | 13.841598467 | 4.267689103  |
| 8 | -3.267985399 | 9.838117223  | 4.191534479  |
| 8 | -2.758456527 | 11.037214903 | 6.730827506  |
| 8 | -2.579496003 | 13.845485878 | 6.679176532  |
| 8 | -1.792719303 | 13.054562069 | 3.182371479  |
| 6 | -1.262051670 | 8.552244415  | -0.240497667 |
| 6 | -0.926353185 | 9.823612102  | -1.026522650 |
| 6 | -1.007512984 | 11.091562821 | -0.162303607 |
| 6 | -2.205892762 | 11.101412913 | 0.799401743  |
| 6 | -3.053456106 | 9.837650829  | 0.668845476  |
| 8 | -1.143167062 | 12.175076956 | -1.087815812 |
| 8 | -1.641286542 | 11.160956096 | 2.114403501  |
| 8 | -2.268825860 | 8.660264155  | 0.732332172  |
| 8 | 0.346523295  | 9.732397112  | -1.617682327 |
| 1 | -3.522323532 | 11.943998380 | 2.740551016  |
| 1 | -1.355756644 | 10.606552648 | 4.574797482  |
| 1 | -4.024113486 | 12.019239851 | 5.400324284  |
| 1 | -1.016481299 | 12.822698057 | 5.744698075  |
| 1 | -1.607182692 | 14.755085381 | 4.248730730  |
| 1 | -3.331524644 | 14.129281174 | 4.108359185  |
| 1 | -2.788745187 | 9.205990171  | 3.634453515  |
| 1 | -2.927781539 | 11.650130957 | 7.458991567  |
| 1 | -1.964274526 | 14.583705303 | 6.780336733  |
| 1 | -0.351735994 | 8.134381643  | 0.279608375  |
| 1 | -1.644230799 | 9.893975541  | -1.889445706 |
| 1 | -0.048682241 | 11.202674204 | 0.421076077  |
| 1 | -2.848655162 | 12.004776869 | 0.605171006  |
| 1 | -3.637340721 | 9.867064917  | -0.286736181 |
| 1 | -3.735812912 | 9.739751018  | 1.558071449  |
| 1 | -1.008735013 | 12.989325940 | -0.586399810 |
| 1 | 0.992395664  | 9.395182913  | -0.957527751 |
| 8 | -1.833355949 | 7.622433448  | -1.185682464 |
| 6 | -1.208469276 | 6.386970780  | -1.151415195 |
| 6 | 0.190277628  | 6.296945248  | -1.187314915 |
| 6 | -2.013261542 | 5.239508981  | -1.095168154 |
| 1 | 0.813868459  | 7.205609502  | -1.299793095 |
| 1 | -3.105479627 | 5.327284109  | -1.151906951 |
| 6 | 0.795750979  | 5.060097513  | -1.024443471 |
| 6 | -1.412685196 | 3.997284540  | -0.937803092 |
| 1 | 1.897299009  | 4.976961498  | -1.015451671 |
| 1 | -2.025158957 | 3.085418855  | -0.852817659 |
| 6 | -0.014564207 | 3.924856515  | -0.855095012 |
| 7 | 0.641910325  | 2.637855526  | -0.553091704 |
| 8 | -0.004860297 | 1.621314606  | -0.576966154 |
| 8 | 1.805191394  | 2.645962413  | -0.266926350 |
| 7 | -6.476165021 | 1.039440738  | -2.851768137 |
| 1 | -6.377623266 | 0.245273883  | -3.481065709 |
| 6 | -6.554527655 | 2.336572123  | -3.538106534 |
| 1 | -7.185370919 | 3.017269907  | -2.962804063 |

|   |              |              |              |
|---|--------------|--------------|--------------|
| 6 | -5.148528919 | 2.961856844  | -3.687614029 |
| 1 | -4.687304916 | 2.996009683  | -2.663276680 |
| 1 | -4.488787703 | 2.297832110  | -4.302147967 |
| 6 | -5.134157502 | 4.359499843  | -4.265311972 |
| 1 | -5.365991399 | 4.345366193  | -5.364563658 |
| 1 | -5.892915186 | 5.010343472  | -3.750402027 |
| 6 | -3.782635034 | 4.988041341  | -4.119488968 |
| 8 | -2.683894631 | 4.601353826  | -4.535462748 |
| 8 | -3.790421320 | 6.172281079  | -3.446050469 |
| 1 | -2.878635611 | 6.475437052  | -3.275993637 |
| 6 | -7.226969128 | 2.087371919  | -4.898708106 |
| 8 | -7.203282486 | 0.963907505  | -5.427655702 |
| 7 | 7.408585144  | 7.752080045  | 1.417970913  |
| 1 | 7.617798959  | 8.145044864  | 0.498266541  |
| 6 | 6.205530476  | 6.910182118  | 1.428201998  |
| 1 | 5.867332989  | 6.763955478  | 2.445965371  |
| 6 | 5.101543961  | 7.651405042  | 0.648765298  |
| 1 | 5.127633637  | 8.737828594  | 0.932618738  |
| 1 | 5.285047297  | 7.624546341  | -0.453046615 |
| 6 | 3.713462115  | 7.145536003  | 0.930721427  |
| 1 | 3.596401745  | 6.086723702  | 0.578814710  |
| 1 | 3.535479917  | 7.172561606  | 2.036840943  |
| 6 | 2.631836981  | 7.959274418  | 0.249908508  |
| 8 | 2.728080075  | 8.316493416  | -0.966860539 |
| 8 | 1.566787115  | 8.255494075  | 0.886251839  |
| 6 | 6.558162039  | 5.548806728  | 0.792383213  |
| 8 | 7.477877988  | 5.472993552  | -0.038335478 |
| 7 | 0.984496382  | -0.341681767 | 2.405180911  |
| 1 | 0.618029060  | -0.789214711 | 3.256320822  |
| 6 | 1.238779073  | 1.082078075  | 2.521833189  |
| 1 | 1.851282728  | 1.421425651  | 1.690070526  |
| 6 | -0.137260809 | 1.796706476  | 2.522130469  |
| 1 | -0.682225961 | 1.541023789  | 1.615891719  |
| 1 | -0.729442944 | 1.377246612  | 3.329426744  |
| 6 | -0.171351084 | 3.315206690  | 2.670097638  |
| 6 | 0.952701043  | 4.101592938  | 2.343263005  |
| 1 | 1.870156960  | 3.671297556  | 1.968671684  |
| 6 | -1.354397805 | 3.959720510  | 3.099308869  |
| 1 | -2.236182715 | 3.380550964  | 3.330514769  |
| 6 | 0.902770869  | 5.493683815  | 2.462301462  |
| 1 | 1.786392866  | 6.060708875  | 2.238092874  |
| 6 | -1.409062924 | 5.367783250  | 3.185808366  |
| 1 | -2.325112588 | 5.863316531  | 3.469543907  |
| 6 | -0.282697946 | 6.133916052  | 2.838797103  |
| 8 | -0.322183184 | 7.494053914  | 2.837355297  |
| 1 | -0.412917462 | 7.821961745  | 1.927371639  |
| 6 | 1.972886228  | 1.335765299  | 3.846026090  |
| 8 | 1.534882460  | 0.865476011  | 4.900534143  |

**Wild Type BCX:**

**AM1/OPLS optimised geometry for transition structure TS1 (QM atoms only, including Tyr69)**

|   |              |              |              |
|---|--------------|--------------|--------------|
| 6 | -2.303326202 | 11.088693797 | 2.645651721  |
| 6 | -2.278433547 | 10.461825389 | 4.060699320  |
| 6 | -2.742465228 | 11.514967514 | 5.075993173  |
| 6 | -1.855513318 | 12.762083413 | 4.900772298  |
| 6 | -1.958443412 | 13.287494813 | 3.467244514  |
| 8 | -3.200412693 | 9.391331160  | 4.079778631  |
| 8 | -2.580911426 | 10.963953103 | 6.374246938  |
| 8 | -2.325736141 | 13.723801306 | 5.832742847  |
| 8 | -1.553149227 | 12.296084757 | 2.534293071  |
| 6 | -0.233141172 | 8.362293380  | -1.005660842 |
| 6 | -0.303877328 | 9.780130147  | -1.483939749 |
| 6 | -0.729083009 | 10.733873541 | -0.354574747 |
| 6 | -1.930355293 | 10.204033899 | 0.444005209  |
| 6 | -2.286284454 | 8.762646760  | 0.092201522  |
| 8 | -1.079839085 | 11.962629013 | -0.989807051 |
| 8 | -1.562699575 | 10.213763225 | 1.824200700  |
| 8 | -1.143811112 | 7.914309113  | -0.147996801 |
| 8 | 0.906243438  | 10.219874817 | -2.040158051 |
| 1 | -3.353407819 | 11.251926813 | 2.290719290  |
| 1 | -1.242827649 | 10.107405122 | 4.312875982  |
| 1 | -3.825069103 | 11.773723244 | 4.912236641  |
| 1 | -0.787405123 | 12.495592720 | 5.130387186  |
| 1 | -1.243280818 | 14.135681109 | 3.297451795  |
| 1 | -3.008808582 | 13.616772744 | 3.248769002  |
| 1 | -2.764507845 | 8.652328406  | 3.632032625  |
| 1 | -2.717953725 | 11.693456872 | 6.992043993  |
| 1 | -1.717792659 | 14.472499277 | 5.786982323  |
| 1 | 0.524124178  | 7.636424980  | -1.367307907 |
| 1 | -1.048584372 | 9.794847731  | -2.334242963 |
| 1 | 0.146081693  | 10.885046254 | 0.342908148  |
| 1 | -2.831016957 | 10.853148219 | 0.254057800  |
| 1 | -2.924641448 | 8.726808336  | -0.829571833 |
| 1 | -2.785833282 | 8.257911190  | 0.964768252  |
| 1 | -1.065182825 | 12.640831667 | -0.299790682 |
| 1 | 1.631875829  | 9.954635209  | -1.446334430 |
| 8 | -1.297900008 | 7.562951616  | -2.665426818 |
| 6 | -1.303052127 | 6.292207354  | -2.408617093 |
| 6 | -0.095625815 | 5.558452802  | -2.175100504 |
| 6 | -2.534252287 | 5.584442043  | -2.259309278 |
| 1 | 0.868739505  | 6.013225027  | -2.444566103 |
| 1 | -3.463592615 | 6.105890083  | -2.523113554 |
| 6 | -0.124464471 | 4.284400007  | -1.660101458 |
| 6 | -2.567175616 | 4.315784552  | -1.729901656 |
| 1 | 0.815101879  | 3.739071787  | -1.463200006 |
| 1 | -3.529779705 | 3.811651256  | -1.540851519 |
| 6 | -1.364525830 | 3.663865966  | -1.391206451 |
| 7 | -1.415152619 | 2.356609504  | -0.752939721 |
| 8 | -2.475297454 | 1.945294422  | -0.333415382 |
| 8 | -0.416378809 | 1.687591037  | -0.646852597 |
| 7 | 7.041091351  | 7.958961618  | 1.436801637  |
| 1 | 7.247326182  | 8.364189742  | 0.528160813  |
| 6 | 5.836639363  | 7.120995228  | 1.470623326  |
| 1 | 5.522871832  | 6.944956627  | 2.492595545  |

|   |              |              |              |
|---|--------------|--------------|--------------|
| 6 | 4.712697869  | 7.881184634  | 0.745699773  |
| 1 | 4.687829427  | 8.931896438  | 1.141110226  |
| 1 | 4.945470668  | 7.967744909  | -0.347742853 |
| 6 | 3.330196222  | 7.297928977  | 0.904869752  |
| 1 | 3.299310564  | 6.238456273  | 0.535337135  |
| 1 | 3.008354792  | 7.295675682  | 1.975340810  |
| 6 | 2.347856867  | 8.070363642  | 0.060736850  |
| 8 | 2.594294737  | 8.291952417  | -1.162450993 |
| 8 | 1.213865755  | 8.482607516  | 0.524939143  |
| 6 | 6.174451580  | 5.784947185  | 0.782281357  |
| 8 | 7.101752004  | 5.727880754  | -0.035187063 |
| 7 | -6.492270546 | 1.036303377  | -2.950457781 |
| 1 | -6.329295110 | 0.235618730  | -3.550246112 |
| 6 | -6.646760799 | 2.305259158  | -3.669173037 |
| 1 | -7.227591004 | 3.010623565  | -3.071271438 |
| 6 | -5.263912303 | 2.918521125  | -3.980668820 |
| 1 | -4.726840749 | 3.060146975  | -3.003253180 |
| 1 | -4.645355987 | 2.192587047  | -4.565837022 |
| 6 | -5.304437446 | 4.248780100  | -4.698187553 |
| 1 | -5.818475319 | 4.176595270  | -5.694050033 |
| 1 | -5.848614898 | 5.007387888  | -4.073706560 |
| 6 | -3.930227835 | 4.752916366  | -5.007886259 |
| 8 | -2.964925431 | 4.138906843  | -5.473631066 |
| 8 | -3.772973074 | 6.089886867  | -4.800050954 |
| 1 | -2.830040242 | 6.329820949  | -4.861484166 |
| 6 | -7.416699913 | 1.995793136  | -4.961147207 |
| 8 | -7.347067979 | 0.881582932  | -5.494322667 |
| 7 | 0.776571775  | -0.316940670 | 2.640480395  |
| 1 | 0.464223283  | -0.742557941 | 3.515636642  |
| 6 | 0.945989746  | 1.124754688  | 2.673398146  |
| 1 | 1.520400572  | 1.448234312  | 1.809714821  |
| 6 | -0.458348867 | 1.764104184  | 2.647299461  |
| 1 | -1.017366006 | 1.386209078  | 1.795216944  |
| 1 | -1.012319849 | 1.420707354  | 3.514947735  |
| 6 | -0.499129414 | 3.284603083  | 2.610835513  |
| 6 | 0.348646723  | 3.990750685  | 1.734020617  |
| 1 | 1.004099325  | 3.466798401  | 1.053004416  |
| 6 | -1.383631227 | 4.001924382  | 3.444582512  |
| 1 | -2.066306107 | 3.478208454  | 4.095387895  |
| 6 | 0.330090266  | 5.393382957  | 1.705943884  |
| 1 | 0.962497009  | 5.905709590  | 1.002036337  |
| 6 | -1.388923910 | 5.411181108  | 3.423085187  |
| 1 | -2.060348035 | 5.967254961  | 4.056655371  |
| 6 | -0.519912204 | 6.106311197  | 2.566427188  |
| 8 | -0.505165906 | 7.467571857  | 2.571540320  |
| 1 | -0.037207122 | 7.811280296  | 1.802034034  |
| 6 | 1.677144124  | 1.506580775  | 3.965188580  |
| 8 | 1.373832530  | 0.975139159  | 5.034337206  |

**Wild Type BCX:**

**AM1/OPLS optimised geometry for intermediate INT (QM atoms only, including Tyr69)**

|   |              |              |              |
|---|--------------|--------------|--------------|
| 6 | -2.427490282 | 11.385400867 | 2.905657215  |
| 6 | -2.391405663 | 10.657401191 | 4.274143005  |
| 6 | -2.965449686 | 11.589436776 | 5.355633143  |
| 6 | -2.192491895 | 12.915391757 | 5.275898576  |
| 6 | -2.389747647 | 13.534147011 | 3.890242601  |
| 8 | -3.234656912 | 9.526130580  | 4.210782462  |
| 8 | -2.773251603 | 10.967232814 | 6.617435841  |
| 8 | -2.670025124 | 13.766156471 | 6.304624900  |
| 8 | -1.808368094 | 12.672148746 | 2.922887967  |
| 6 | -0.120254058 | 8.743232988  | -0.556095363 |
| 6 | -0.402475595 | 10.097677530 | -1.208259589 |
| 6 | -0.863042628 | 11.165679628 | -0.209659853 |
| 6 | -2.002732602 | 10.617646970 | 0.671710859  |
| 6 | -2.293730166 | 9.147160371  | 0.372071331  |
| 8 | -1.341005637 | 12.255424016 | -0.995022906 |
| 8 | -1.569473436 | 10.683891661 | 2.036172566  |
| 8 | -1.122046927 | 8.341814354  | 0.352430343  |
| 8 | 0.736089037  | 10.603673822 | -1.868366890 |
| 1 | -3.481639566 | 11.470492064 | 2.536546687  |
| 1 | -1.338493343 | 10.361794102 | 4.528302770  |
| 1 | -4.065199724 | 11.755430371 | 5.186392818  |
| 1 | -1.098875189 | 12.707727177 | 5.434282802  |
| 1 | -1.831070882 | 14.499950072 | 3.786429806  |
| 1 | -3.479020804 | 13.695706299 | 3.675986996  |
| 1 | -2.791737724 | 8.880452409  | 3.642355360  |
| 1 | -3.017111067 | 11.627700684 | 7.279713384  |
| 1 | -2.006040199 | 14.462010397 | 6.396323623  |
| 1 | -0.015829147 | 7.941296671  | -1.348082938 |
| 1 | -1.218322459 | 9.899540892  | -1.961398192 |
| 1 | 0.003758797  | 11.490157673 | 0.429775398  |
| 1 | -2.934237077 | 11.224403602 | 0.500793007  |
| 1 | -2.834235984 | 9.056861994  | -0.606049366 |
| 1 | -2.904277465 | 8.687015566  | 1.198244434  |
| 1 | -1.325395723 | 13.035618400 | -0.424229508 |
| 1 | 1.063359335  | 9.885702840  | -2.434657592 |
| 8 | -0.380757328 | 8.144865012  | -4.212339535 |
| 6 | -0.740636319 | 7.080454475  | -3.610408691 |
| 6 | 0.160002135  | 6.335520436  | -2.767615707 |
| 6 | -2.083293884 | 6.573804259  | -3.716169049 |
| 1 | 1.209175062  | 6.655961836  | -2.718724059 |
| 1 | -2.771035106 | 7.094128114  | -4.394090588 |
| 6 | -0.237516839 | 5.208611609  | -2.096022523 |
| 6 | -2.472180960 | 5.441937600  | -3.046584617 |
| 1 | 0.483988296  | 4.636127899  | -1.487923816 |
| 1 | -3.501457354 | 5.058167222  | -3.160788321 |
| 6 | -1.570872838 | 4.746638651  | -2.209843336 |
| 7 | -1.984567888 | 3.534028928  | -1.521228175 |
| 8 | -3.123451451 | 3.132895812  | -1.626246828 |
| 8 | -1.190634258 | 2.917279173  | -0.851670496 |
| 7 | -6.730445741 | 0.868616951  | -2.289787298 |
| 1 | -6.470345217 | 0.040025544  | -2.813932148 |
| 6 | -6.825543543 | 2.103221033  | -3.072379966 |
| 1 | -7.057816958 | 2.951365519  | -2.427435469 |

|   |              |              |              |
|---|--------------|--------------|--------------|
| 6 | -5.503767360 | 2.388401341  | -3.815026082 |
| 1 | -4.678594357 | 2.475620971  | -3.054591777 |
| 1 | -5.231793627 | 1.529517904  | -4.476899880 |
| 6 | -5.539804922 | 3.653635559  | -4.640368364 |
| 1 | -6.229568545 | 3.558061008  | -5.522301125 |
| 1 | -5.893359113 | 4.518441320  | -4.016760001 |
| 6 | -4.205594068 | 4.002507254  | -5.207109407 |
| 8 | -3.186843704 | 3.314502606  | -5.313778722 |
| 8 | -4.139838522 | 5.277767045  | -5.686164848 |
| 1 | -3.230380044 | 5.482898018  | -5.968643575 |
| 6 | -7.943475042 | 1.914708706  | -4.100245879 |
| 8 | -8.092726911 | 0.835514122  | -4.684897967 |
| 7 | 6.901619961  | 8.282316047  | 1.160229245  |
| 1 | 7.075360930  | 8.717799643  | 0.259086502  |
| 6 | 5.696740082  | 7.443688546  | 1.212264293  |
| 1 | 5.403150981  | 7.271532137  | 2.245068232  |
| 6 | 4.565137514  | 8.201971059  | 0.483335171  |
| 1 | 4.571661601  | 9.267138012  | 0.840506981  |
| 1 | 4.784720607  | 8.237498440  | -0.616350908 |
| 6 | 3.175388158  | 7.654227244  | 0.699976500  |
| 1 | 3.129751313  | 6.551077414  | 0.481091960  |
| 1 | 2.841322916  | 7.803418214  | 1.759722635  |
| 6 | 2.206814136  | 8.296706988  | -0.246686811 |
| 8 | 2.354541459  | 8.465491633  | -1.462184546 |
| 8 | 1.026528507  | 8.722318001  | 0.311510793  |
| 6 | 6.040733488  | 6.107827688  | 0.523241725  |
| 8 | 6.870554566  | 6.088922105  | -0.395209553 |
| 7 | 0.827767105  | 0.109922312  | 2.637127624  |
| 1 | 0.487860475  | -0.299786807 | 3.508879543  |
| 6 | 0.925250089  | 1.557137877  | 2.628119877  |
| 1 | 1.541036086  | 1.894859993  | 1.795584596  |
| 6 | -0.501878511 | 2.126525511  | 2.482562640  |
| 1 | -0.912875730 | 1.830167332  | 1.517068433  |
| 1 | -1.153681479 | 1.678842098  | 3.228985111  |
| 6 | -0.591618487 | 3.637493773  | 2.584885611  |
| 6 | 0.112317506  | 4.428186761  | 1.658973197  |
| 1 | 0.641293000  | 3.966227346  | 0.836439135  |
| 6 | -1.286594672 | 4.256728830  | 3.645973977  |
| 1 | -1.857365079 | 3.668085873  | 4.343192809  |
| 6 | 0.136252427  | 5.822436763  | 1.804011868  |
| 1 | 0.672650349  | 6.399385225  | 1.074759403  |
| 6 | -1.269416602 | 5.658054684  | 3.780017295  |
| 1 | -1.825353380 | 6.140630157  | 4.567405681  |
| 6 | -0.544228235 | 6.440525746  | 2.868582116  |
| 8 | -0.551778835 | 7.797026542  | 2.986398277  |
| 1 | -0.403166839 | 8.188404761  | 2.123749684  |
| 6 | 1.571692750  | 2.006491213  | 3.944732372  |
| 8 | 1.334523736  | 1.412850130  | 4.999834026  |

**Tyr69/Phe mutant BCX:**

**AM1/OPLS optimised geometry for reactant complex RC (QM atoms only,  
including Phe69)**

|   |              |              |              |
|---|--------------|--------------|--------------|
| 6 | -2.584231584 | 11.689631374 | 2.783904799  |
| 6 | -2.515362991 | 10.945279033 | 4.138161483  |
| 6 | -3.056513443 | 11.858893718 | 5.246872544  |
| 6 | -2.284414087 | 13.189781752 | 5.183473518  |
| 6 | -2.447086128 | 13.822913793 | 3.799916746  |
| 8 | -3.366971304 | 9.818419023  | 4.046157354  |
| 8 | -2.831163474 | 11.210485579 | 6.488837547  |
| 8 | -2.823009235 | 14.019586151 | 6.199589094  |
| 8 | -1.933600101 | 12.958279087 | 2.796825378  |
| 6 | -1.219520080 | 8.329342300  | -0.532673644 |
| 6 | -0.979462483 | 9.641165228  | -1.294280546 |
| 6 | -1.098724932 | 10.874267643 | -0.383414039 |
| 6 | -2.304319337 | 10.826752927 | 0.567032934  |
| 6 | -3.049749597 | 9.497769598  | 0.469434407  |
| 8 | -1.255416288 | 11.989937519 | -1.265410721 |
| 8 | -1.763593640 | 10.975706100 | 1.884058551  |
| 8 | -2.171773189 | 8.386257499  | 0.503299437  |
| 8 | 0.275846115  | 9.656680238  | -1.926634563 |
| 1 | -3.647649882 | 11.796330575 | 2.439956382  |
| 1 | -1.458127450 | 10.638852703 | 4.365957440  |
| 1 | -4.159796392 | 12.035530486 | 5.110292827  |
| 1 | -1.194432590 | 12.997945266 | 5.384708705  |
| 1 | -1.830231856 | 14.755313414 | 3.705574208  |
| 1 | -3.526811562 | 14.055406849 | 3.600828358  |
| 1 | -2.868011735 | 9.141312823  | 3.568753515  |
| 1 | -3.066340745 | 11.852729894 | 7.171838764  |
| 1 | -2.298628793 | 14.830687838 | 6.196199671  |
| 1 | -0.274758534 | 7.912335139  | -0.068754286 |
| 1 | -1.732480475 | 9.706406003  | -2.129234089 |
| 1 | -0.144738734 | 10.981617667 | 0.206830362  |
| 1 | -3.014682920 | 11.668496508 | 0.332605668  |
| 1 | -3.661865664 | 9.486016817  | -0.469653393 |
| 1 | -3.702610943 | 9.350303236  | 1.373485715  |
| 1 | -1.149681097 | 12.786771318 | -0.730657036 |
| 1 | 0.937361572  | 9.225446601  | -1.342896135 |
| 8 | -1.821388777 | 7.441448192  | -1.491361005 |
| 6 | -1.439253383 | 6.117563590  | -1.370302309 |
| 6 | -0.103147809 | 5.725720321  | -1.218342372 |
| 6 | -2.465968440 | 5.163541982  | -1.473912163 |
| 1 | 0.713871216  | 6.473642450  | -1.240156110 |
| 1 | -3.490439698 | 5.478705048  | -1.701218605 |
| 6 | 0.194946676  | 4.378155241  | -1.039459472 |
| 6 | -2.181384235 | 3.824647372  | -1.270787427 |
| 1 | 1.241797209  | 4.049893364  | -0.912130612 |
| 1 | -2.987991342 | 3.073530751  | -1.292524316 |
| 6 | -0.853962661 | 3.444912691  | -1.012835884 |
| 7 | -0.580326228 | 2.033165856  | -0.697774910 |
| 8 | -1.505941715 | 1.317288948  | -0.397982862 |
| 8 | 0.541597771  | 1.612005945  | -0.726423131 |
| 7 | -6.601599462 | 1.241481538  | -3.092146386 |
| 1 | -6.509913485 | 0.452478549  | -3.726952895 |
| 6 | -6.719849775 | 2.533795593  | -3.778427249 |
| 1 | -7.370941576 | 3.196671673  | -3.204687666 |



|   |              |              |              |
|---|--------------|--------------|--------------|
| 6 | -5.333546889 | 3.200654518  | -3.934406565 |
| 1 | -4.875210670 | 3.268382496  | -2.909488688 |
| 1 | -4.651904659 | 2.545630122  | -4.534306759 |
| 6 | -5.357725818 | 4.587100168  | -4.538758729 |
| 1 | -5.629526564 | 4.551139468  | -5.628415887 |
| 1 | -6.104048858 | 5.238427603  | -4.007465879 |
| 6 | -4.006893956 | 5.228003965  | -4.458868245 |
| 8 | -2.924661607 | 4.840840744  | -4.914587639 |
| 8 | -3.989240384 | 6.423409817  | -3.803461142 |
| 1 | -3.070962928 | 6.727323911  | -3.673750826 |
| 6 | -7.385765853 | 2.249095972  | -5.135475355 |
| 8 | -7.327455372 | 1.120824873  | -5.653036140 |
| 7 | 7.199226209  | 7.875672229  | 1.283010397  |
| 1 | 7.411660521  | 8.226158612  | 0.346812961  |
| 6 | 6.032283126  | 6.985363312  | 1.313720569  |
| 1 | 5.727316141  | 6.793587497  | 2.335416027  |
| 6 | 4.874831065  | 7.682431679  | 0.572378404  |
| 1 | 4.701553329  | 8.683265126  | 1.051918798  |
| 1 | 5.157713835  | 7.895579401  | -0.490060055 |
| 6 | 3.567201850  | 6.932820132  | 0.582041091  |
| 1 | 3.652750225  | 5.966283003  | 0.020937997  |
| 1 | 3.266436823  | 6.705101899  | 1.636652548  |
| 6 | 2.474997266  | 7.742706698  | -0.083859024 |
| 8 | 2.425501275  | 7.856280341  | -1.348909714 |
| 8 | 1.558857634  | 8.288391372  | 0.614484529  |
| 6 | 6.410924379  | 5.652629555  | 0.644448013  |
| 8 | 7.305292420  | 5.608816331  | -0.215852274 |
| 7 | 0.937066320  | -0.318664634 | 2.477871374  |
| 1 | 0.496835944  | -0.712768901 | 3.319283821  |
| 6 | 1.140940250  | 1.117794722  | 2.538351638  |
| 1 | 1.639507343  | 1.476923846  | 1.640111878  |
| 6 | -0.274928296 | 1.725712076  | 2.681519135  |
| 1 | -0.935382739 | 1.307259840  | 1.930380981  |
| 1 | -0.686250933 | 1.360391791  | 3.616487672  |
| 6 | -0.466915892 | 3.237782056  | 2.686109748  |
| 6 | 0.542072796  | 4.125116827  | 2.254796632  |
| 1 | 1.484161488  | 3.769382349  | 1.861528566  |
| 6 | -1.719375609 | 3.760717927  | 3.074098068  |
| 1 | -2.524218895 | 3.095080942  | 3.347702253  |
| 6 | 0.309439506  | 5.510111659  | 2.250209638  |
| 1 | 1.081032799  | 6.169296818  | 1.887926382  |
| 6 | -1.950468746 | 5.148975867  | 3.060674572  |
| 1 | -2.920821724 | 5.540771763  | 3.323246737  |
| 6 | -0.935971065 | 6.027607363  | 2.644645623  |
| 1 | -1.120804341 | 7.091256531  | 2.587589245  |
| 6 | 1.944477683  | 1.446044892  | 3.804607541  |
| 8 | 1.650115472  | 0.910685488  | 4.880925878  |

**Tyr69/Phe mutant BCX:**

**AM1/OPLS optimised geometry for transition structure TS1 (QM atoms only,  
including Phe69)**

|   |              |              |              |
|---|--------------|--------------|--------------|
| 6 | -2.429847099 | 11.374820958 | 2.768046628  |
| 6 | -2.511777530 | 10.830525605 | 4.211897885  |
| 6 | -3.032107945 | 11.924452234 | 5.151513868  |
| 6 | -2.183268662 | 13.192618488 | 4.947617361  |
| 6 | -2.210326529 | 13.622437371 | 3.478809708  |
| 8 | -3.457094010 | 9.778395976  | 4.209395272  |
| 8 | -2.888774928 | 11.435617383 | 6.477361880  |
| 8 | -2.751093969 | 14.187876788 | 5.785032329  |
| 8 | -1.698353055 | 12.591854223 | 2.644230563  |
| 6 | 0.180262351  | 8.877701803  | -0.765888202 |
| 6 | -0.039607176 | 10.304229552 | -1.180259009 |
| 6 | -0.530520341 | 11.119871669 | 0.028344593  |
| 6 | -1.774166421 | 10.460066793 | 0.654035912  |
| 6 | -1.956914831 | 9.007649664  | 0.221231529  |
| 8 | -0.889700167 | 12.410884882 | -0.448859768 |
| 8 | -1.616658525 | 10.454847892 | 2.072256372  |
| 8 | -0.720974649 | 8.293390192  | 0.016278534  |
| 8 | 1.065072822  | 10.921483027 | -1.788120997 |
| 1 | -3.450795900 | 11.492891092 | 2.318085183  |
| 1 | -1.502305745 | 10.473173685 | 4.552975705  |
| 1 | -4.116612243 | 12.141185301 | 4.945042412  |
| 1 | -1.122730355 | 12.990172125 | 5.261817609  |
| 1 | -1.523008560 | 14.491162988 | 3.299853691  |
| 1 | -3.256349091 | 13.886542960 | 3.169303315  |
| 1 | -2.997544557 | 9.004690814  | 3.857198322  |
| 1 | -3.128141878 | 12.167886903 | 7.059057533  |
| 1 | -2.211638785 | 14.981576937 | 5.678390066  |
| 1 | 0.987521368  | 8.222292895  | -1.149097760 |
| 1 | -0.840516630 | 10.264941692 | -1.979756684 |
| 1 | 0.301529355  | 11.185819554 | 0.783789806  |
| 1 | -2.693541166 | 11.039265119 | 0.354656395  |
| 1 | -2.524586773 | 8.963552124  | -0.747055336 |
| 1 | -2.468800047 | 8.402978087  | 1.017228171  |
| 1 | -0.841094375 | 13.009825236 | 0.311249489  |
| 1 | 1.878941041  | 10.574556582 | -1.379793381 |
| 8 | -0.647811176 | 8.137676602  | -2.608345464 |
| 6 | -0.782208447 | 6.864341396  | -2.410815913 |
| 6 | 0.321827228  | 6.038963376  | -2.022759215 |
| 6 | -2.066005825 | 6.244791879  | -2.495251657 |
| 1 | 1.340360346  | 6.445781907  | -2.078222796 |
| 1 | -2.907233774 | 6.851235166  | -2.854374790 |
| 6 | 0.132062764  | 4.742008710  | -1.609476956 |
| 6 | -2.258849528 | 4.947316295  | -2.079876637 |
| 1 | 0.989431669  | 4.118318409  | -1.301061006 |
| 1 | -3.262854247 | 4.492328557  | -2.116300494 |
| 6 | -1.172021196 | 4.196885515  | -1.589688592 |
| 7 | -1.391834214 | 2.851691093  | -1.076089169 |
| 8 | -2.522255149 | 2.473520668  | -0.854432103 |
| 8 | -0.454514128 | 2.119108135  | -0.875215232 |
| 7 | 7.385460401  | 7.998904148  | 1.356261271  |
| 1 | 7.605117579  | 8.372071755  | 0.436253832  |
| 6 | 6.141685353  | 7.229150028  | 1.422885836  |
| 1 | 5.868863950  | 7.039529082  | 2.455370867  |

|   |              |              |              |
|---|--------------|--------------|--------------|
| 6 | 5.053817462  | 8.081801277  | 0.751690648  |
| 1 | 5.213762555  | 9.155482095  | 1.042764263  |
| 1 | 5.164507170  | 8.055687671  | -0.363400726 |
| 6 | 3.632761264  | 7.736987446  | 1.113847847  |
| 1 | 3.383447038  | 6.679620899  | 0.834102700  |
| 1 | 3.474116102  | 7.848659252  | 2.213295009  |
| 6 | 2.679406419  | 8.627967296  | 0.357825451  |
| 8 | 2.938506175  | 8.990455194  | -0.830219014 |
| 8 | 1.550310222  | 9.001504079  | 0.860391768  |
| 6 | 6.367145727  | 5.888897815  | 0.702717042  |
| 8 | 7.326887283  | 5.754718601  | -0.068597628 |
| 7 | -6.777422583 | 1.128216721  | -3.079215789 |
| 1 | -6.636560257 | 0.318339504  | -3.673301764 |
| 6 | -6.916747091 | 2.395828098  | -3.801973194 |
| 1 | -7.511021614 | 3.099278151  | -3.215220226 |
| 6 | -5.524832425 | 3.006465324  | -4.069898750 |
| 1 | -4.989412504 | 3.092568675  | -3.084304102 |
| 1 | -4.912799847 | 2.305715923  | -4.692974901 |
| 6 | -5.548697138 | 4.372265973  | -4.715958705 |
| 1 | -6.097167362 | 4.370549827  | -5.695804656 |
| 1 | -6.047175787 | 5.114300549  | -4.036750662 |
| 6 | -4.167086842 | 4.840082796  | -5.042381222 |
| 8 | -3.223518719 | 4.202352575  | -5.521096311 |
| 8 | -3.961754222 | 6.168374453  | -4.822248734 |
| 1 | -3.022360977 | 6.388091729  | -4.969361373 |
| 6 | -7.659731160 | 2.094060100  | -5.113018344 |
| 8 | -7.582005228 | 0.981915878  | -5.647995964 |
| 7 | 0.673635552  | -0.008715123 | 2.363708887  |
| 1 | 0.370602010  | -0.418099264 | 3.249810750  |
| 6 | 0.834769855  | 1.436304747  | 2.372942963  |
| 1 | 1.396916887  | 1.759779196  | 1.499991509  |
| 6 | -0.576741738 | 2.066058827  | 2.354467017  |
| 1 | -1.117926968 | 1.729755156  | 1.473780429  |
| 1 | -1.136445760 | 1.653947584  | 3.187551974  |
| 6 | -0.684432734 | 3.586079491  | 2.429250554  |
| 6 | 0.303098370  | 4.421252615  | 1.861549510  |
| 1 | 1.143221355  | 4.005807511  | 1.324456599  |
| 6 | -1.813420446 | 4.173237586  | 3.039978725  |
| 1 | -2.608056391 | 3.549943777  | 3.422493339  |
| 6 | 0.201179952  | 5.819113170  | 1.973114014  |
| 1 | 0.964322404  | 6.451670457  | 1.543852257  |
| 6 | -1.934728068 | 5.574933699  | 3.112522804  |
| 1 | -2.823083071 | 6.023340402  | 3.527614063  |
| 6 | -0.911531113 | 6.396906528  | 2.608411946  |
| 1 | -0.985076651 | 7.472328896  | 2.677729120  |
| 6 | 1.574697297  | 1.803744905  | 3.665434785  |
| 8 | 1.237814520  | 1.295800976  | 4.737628944  |

**Tyr69/Phe mutant BCX:**

**AM1/OPLS optimised geometry for intermediate INT (QM atoms only, including Phe69)**

|   |              |              |              |
|---|--------------|--------------|--------------|
| 6 | -2.451978428 | 11.250635229 | 2.787726377  |
| 6 | -2.415893809 | 10.522635553 | 4.156212167  |
| 6 | -2.989937832 | 11.454671138 | 5.237702305  |
| 6 | -2.216980041 | 12.780626119 | 5.157967738  |
| 6 | -2.414235793 | 13.399381373 | 3.772311763  |
| 8 | -3.259145058 | 9.391364942  | 4.092851624  |
| 8 | -2.797739749 | 10.832467176 | 6.499505003  |
| 8 | -2.694513270 | 13.631390833 | 6.186694062  |
| 8 | -1.832856240 | 12.537383108 | 2.804957129  |
| 6 | -0.144742204 | 8.608467350  | -0.674026201 |
| 6 | -0.426963741 | 9.962911892  | -1.326190427 |
| 6 | -0.887530774 | 11.030913990 | -0.327590691 |
| 6 | -2.027220748 | 10.482881332 | 0.553780021  |
| 6 | -2.318218312 | 9.012394733  | 0.254140493  |
| 8 | -1.365493783 | 12.120658378 | -1.112953744 |
| 8 | -1.593961582 | 10.549126023 | 1.918241728  |
| 8 | -1.146535073 | 8.207048716  | 0.234499505  |
| 8 | 0.711600891  | 10.468908184 | -1.986297728 |
| 1 | -3.506127712 | 11.335726426 | 2.418615849  |
| 1 | -1.362981489 | 10.227028464 | 4.410371932  |
| 1 | -4.089687870 | 11.620664733 | 5.068461980  |
| 1 | -1.123363335 | 12.572961539 | 5.316351964  |
| 1 | -1.855559028 | 14.365184434 | 3.668498968  |
| 1 | -3.503508950 | 13.560940661 | 3.558056158  |
| 1 | -2.816225870 | 8.745686771  | 3.524424522  |
| 1 | -3.041599213 | 11.492935046 | 7.161782546  |
| 1 | -2.030528345 | 14.327244759 | 6.278392785  |
| 1 | -0.040317293 | 7.806531033  | -1.466013776 |
| 1 | -1.242810605 | 9.764775254  | -2.079329030 |
| 1 | -0.020729349 | 11.355392035 | 0.311844560  |
| 1 | -2.958725223 | 11.089637964 | 0.382862169  |
| 1 | -2.858724130 | 8.922096356  | -0.723980204 |
| 1 | -2.928765611 | 8.552249928  | 1.080313596  |
| 1 | -1.349883869 | 12.900852762 | -0.542160346 |
| 1 | 1.038871189  | 9.750937202  | -2.552588430 |
| 8 | -0.571623924 | 8.042242838  | -4.278460672 |
| 6 | -0.931502915 | 6.977832301  | -3.676529828 |
| 6 | -0.030864461 | 6.232898262  | -2.833736844 |
| 6 | -2.274160480 | 6.471182085  | -3.782290186 |
| 1 | 1.018308466  | 6.553339662  | -2.784845196 |
| 1 | -2.961901702 | 6.991505940  | -4.460211725 |
| 6 | -0.428383435 | 5.105989435  | -2.162143660 |
| 6 | -2.663047556 | 5.339315426  | -3.112705754 |
| 1 | 0.293121700  | 4.533505725  | -1.554044953 |
| 1 | -3.692323950 | 4.955545048  | -3.226909458 |
| 6 | -1.761739434 | 4.644016477  | -2.275964473 |
| 7 | -2.175434484 | 3.431406754  | -1.587349312 |
| 8 | -3.314318047 | 3.030273638  | -1.692367965 |
| 8 | -1.381500854 | 2.814656999  | -0.917791633 |
| 7 | -6.703602707 | 1.215545033  | -2.219838522 |
| 1 | -6.443502183 | 0.386953626  | -2.743983372 |
| 6 | -6.798700509 | 2.450149115  | -3.002431190 |
| 1 | -7.030973924 | 3.298293601  | -2.357486693 |

|   |              |              |              |
|---|--------------|--------------|--------------|
| 6 | -5.476924326 | 2.735329423  | -3.745077306 |
| 1 | -4.651751323 | 2.822549053  | -2.984643001 |
| 1 | -5.204950593 | 1.876445986  | -4.406951104 |
| 6 | -5.512961888 | 4.000563641  | -4.570419588 |
| 1 | -6.202725511 | 3.904989090  | -5.452352349 |
| 1 | -5.866516079 | 4.865369402  | -3.946811225 |
| 6 | -4.178751034 | 4.349435336  | -5.137160631 |
| 8 | -3.160000670 | 3.661430688  | -5.243829946 |
| 8 | -4.112995488 | 5.624695127  | -5.616216072 |
| 1 | -3.264173215 | 6.102629949  | -5.608047499 |
| 6 | -7.916632008 | 2.261636788  | -4.030297103 |
| 8 | -8.065883877 | 1.182442204  | -4.614949191 |
| 7 | 6.877131815  | 8.147550409  | 1.042298407  |
| 1 | 7.050872784  | 8.583034005  | 0.141155664  |
| 6 | 5.672251936  | 7.308922908  | 1.094333455  |
| 1 | 5.378662835  | 7.136766499  | 2.127137394  |
| 6 | 4.540649368  | 8.067205421  | 0.365404333  |
| 1 | 4.547173455  | 9.132372374  | 0.722576143  |
| 1 | 4.760232461  | 8.102732802  | -0.734281746 |
| 6 | 3.150900012  | 7.519461606  | 0.582045662  |
| 1 | 3.105263167  | 6.416311776  | 0.363161122  |
| 1 | 2.816834770  | 7.668652576  | 1.641791797  |
| 6 | 2.182325990  | 8.161941350  | -0.364617649 |
| 8 | 2.330053313  | 8.330725995  | -1.580115384 |
| 8 | 1.002040361  | 8.587552363  | 0.193579955  |
| 6 | 6.016245342  | 5.973062050  | 0.405310887  |
| 8 | 6.846066420  | 5.954156467  | -0.513140391 |
| 7 | 0.792824798  | 0.384467169  | 2.710071788  |
| 1 | 0.452918168  | -0.025241950 | 3.581823707  |
| 6 | 0.890307782  | 1.831682734  | 2.701064041  |
| 1 | 1.506093779  | 2.169404850  | 1.868528760  |
| 6 | -0.536820818 | 2.401070368  | 2.555506804  |
| 1 | -0.947818037 | 2.104712189  | 1.590012597  |
| 1 | -1.188623786 | 1.953386955  | 3.301929275  |
| 6 | -0.626560794 | 3.912038630  | 2.657829775  |
| 6 | 0.077375199  | 4.702731618  | 1.731917361  |
| 1 | 0.606350693  | 4.240772203  | 0.909383299  |
| 6 | -1.321536979 | 4.531273687  | 3.718918141  |
| 1 | -1.892307386 | 3.942630730  | 4.416136973  |
| 6 | 0.101310120  | 6.096981620  | 1.876956032  |
| 1 | 0.637708042  | 6.673930082  | 1.147703567  |
| 6 | -1.304358909 | 5.932599541  | 3.852961459  |
| 1 | -1.860295687 | 6.415175014  | 4.640349845  |
| 6 | -0.579170542 | 6.715070603  | 2.941526280  |
| 1 | -0.585057569 | 7.772702681  | 3.033384797  |
| 6 | 1.536750443  | 2.281036070  | 4.017676536  |
| 8 | 1.299581429  | 1.687394987  | 5.072778190  |

**Wild-type BCX:**

**AM1 optimised geometry for transition structure TS1 (gas phase)**

|   |              |              |              |
|---|--------------|--------------|--------------|
| 8 | 0.777288000  | -0.755304000 | 1.212428000  |
| 6 | 0.930952000  | -0.733102000 | -0.111587000 |
| 6 | 1.899288000  | 0.221356000  | -0.766346000 |
| 6 | 3.184472000  | 0.402019000  | 0.073539000  |
| 6 | 2.927206000  | 0.377974000  | 1.594725000  |
| 6 | 1.439106000  | 0.311178000  | 1.927021000  |
| 8 | 2.208938000  | -0.200125000 | -2.073915000 |
| 8 | 3.839955000  | 1.603281000  | -0.284994000 |
| 8 | 3.629366000  | -0.672473000 | 2.223313000  |
| 8 | -0.619656000 | 0.502887000  | -0.288788000 |
| 6 | -1.845262000 | 0.103691000  | -0.160639000 |
| 6 | -2.918050000 | 0.989111000  | -0.508833000 |
| 6 | -4.230512000 | 0.605855000  | -0.373955000 |
| 6 | -4.548908000 | -0.680843000 | 0.117740000  |
| 6 | -3.509113000 | -1.574381000 | 0.463863000  |
| 6 | -2.195108000 | -1.193078000 | 0.330766000  |
| 7 | -5.943743000 | -1.082254000 | 0.267921000  |
| 8 | -6.213517000 | -2.181306000 | 0.693280000  |
| 8 | -6.827643000 | -0.312046000 | -0.030245000 |
| 8 | 2.461374000  | -2.251265000 | 0.138652000  |
| 6 | 2.352467000  | -3.266398000 | -0.645959000 |
| 6 | 3.034216000  | -4.562641000 | -0.263854000 |
| 8 | 1.703045000  | -3.138397000 | -1.720047000 |
| 8 | -0.571311000 | 3.389954000  | -0.982615000 |
| 6 | 0.486367000  | 4.028812000  | -0.435744000 |
| 6 | 0.529837000  | 5.497083000  | -0.728160000 |
| 6 | 1.046402000  | 6.279380000  | 0.451256000  |
| 8 | 1.294964000  | 3.354093000  | 0.216268000  |
| 1 | -0.542806000 | 2.428116000  | -0.778954000 |
| 1 | -1.385259000 | -1.880772000 | 0.613646000  |
| 1 | -3.761979000 | -2.578535000 | 0.843844000  |
| 1 | -5.044737000 | 1.297471000  | -0.647675000 |
| 1 | -2.664914000 | 1.987112000  | -0.893347000 |
| 1 | 3.211836000  | 2.327788000  | -0.158858000 |
| 1 | 3.355490000  | 1.314530000  | 2.057561000  |
| 1 | 1.273567000  | 0.036882000  | 3.000643000  |
| 1 | 1.394365000  | 1.229780000  | -0.896385000 |
| 1 | 0.929726000  | 1.275667000  | 1.660287000  |
| 1 | 0.422034000  | -1.545926000 | -0.670414000 |
| 1 | 3.916098000  | -0.414834000 | -0.195183000 |
| 1 | 3.346046000  | -1.506498000 | 1.812712000  |
| 1 | 2.417514000  | -1.151581000 | -2.039190000 |
| 1 | 1.204083000  | 5.637241000  | -1.615885000 |
| 1 | -0.495673000 | 5.847656000  | -1.018624000 |
| 1 | 1.184292000  | 7.349842000  | 0.165927000  |
| 1 | 0.327430000  | 6.227760000  | 1.304172000  |
| 1 | 2.026543000  | 5.866247000  | 0.794390000  |
| 6 | 2.102921000  | -5.737817000 | -0.395585000 |
| 1 | 3.916250000  | -4.695491000 | -0.943312000 |
| 1 | 3.417754000  | -4.482245000 | 0.785530000  |
| 1 | 2.656452000  | -6.695840000 | -0.245083000 |
| 1 | 1.286194000  | -5.678668000 | 0.363605000  |
| 1 | 1.635780000  | -5.743522000 | -1.411014000 |

**Wild-type BCX:**

**B3LYP/6-31G\* optimised geometry for transition structure TS1 (gas phase)**

|   |              |              |              |
|---|--------------|--------------|--------------|
| 6 | 1.455413000  | -1.861868000 | 0.673358000  |
| 6 | 1.840519000  | -0.570521000 | 0.196003000  |
| 6 | 3.159898000  | -0.429645000 | -0.337545000 |
| 6 | 4.029068000  | -1.503316000 | -0.385064000 |
| 6 | 3.619444000  | -2.763528000 | 0.089697000  |
| 6 | 2.327306000  | -2.934148000 | 0.618694000  |
| 8 | 1.016896000  | 0.442161000  | 0.246874000  |
| 7 | 4.524469000  | -3.876736000 | 0.037395000  |
| 8 | 5.666358000  | -3.700293000 | -0.428993000 |
| 8 | 4.139871000  | -4.983531000 | 0.460275000  |
| 6 | -1.214432000 | 0.263414000  | -0.229781000 |
| 8 | -1.273027000 | 1.328917000  | -0.950650000 |
| 6 | -1.815483000 | 2.532844000  | -0.314026000 |
| 6 | -3.162035000 | 2.215570000  | 0.334427000  |
| 6 | -3.007502000 | 1.077134000  | 1.368510000  |
| 6 | -1.683077000 | 0.277518000  | 1.202126000  |
| 8 | -1.746309000 | -0.992946000 | 1.784961000  |
| 8 | -3.047595000 | 1.654772000  | 2.677005000  |
| 8 | -4.145091000 | 1.936152000  | -0.645310000 |
| 8 | -3.266477000 | -0.616708000 | -1.091584000 |
| 6 | -3.803194000 | -1.726022000 | -0.742194000 |
| 6 | -4.838286000 | -2.304126000 | -1.716207000 |
| 6 | -5.511269000 | -3.596831000 | -1.252812000 |
| 8 | -3.534696000 | -2.351284000 | 0.313570000  |
| 8 | 1.466066000  | 2.985846000  | 0.308959000  |
| 6 | 2.480505000  | 3.581544000  | -0.315864000 |
| 6 | 2.463295000  | 5.090290000  | -0.102701000 |
| 6 | 3.615010000  | 5.820831000  | -0.791984000 |
| 8 | 3.326730000  | 3.002383000  | -0.978886000 |
| 1 | 1.447364000  | 1.965082000  | 0.185776000  |
| 1 | -0.877275000 | -0.627621000 | -0.735630000 |
| 1 | -0.908936000 | 0.838556000  | 1.742022000  |
| 1 | -1.068818000 | 2.894856000  | 0.399339000  |
| 1 | -2.896977000 | 0.932778000  | 3.310844000  |
| 1 | -3.842523000 | 0.381893000  | 1.242378000  |
| 1 | -3.492764000 | 3.112021000  | 0.870664000  |
| 1 | -3.973859000 | 1.026756000  | -0.991172000 |
| 1 | -1.924893000 | 3.239343000  | -1.135962000 |
| 1 | 3.462940000  | 0.545901000  | -0.707129000 |
| 1 | 5.028376000  | -1.391140000 | -0.790908000 |
| 1 | 2.031354000  | -3.909983000 | 0.987483000  |
| 1 | 0.465471000  | -1.976757000 | 1.106237000  |
| 1 | -2.411862000 | -1.547373000 | 1.273393000  |
| 1 | 1.491796000  | 5.463414000  | -0.454527000 |
| 1 | 2.470943000  | 5.270108000  | 0.980750000  |
| 1 | 3.551941000  | 6.899914000  | -0.604940000 |
| 1 | 4.583020000  | 5.462246000  | -0.426862000 |
| 1 | 3.595154000  | 5.655069000  | -1.874160000 |
| 1 | -5.583534000 | -1.519456000 | -1.905743000 |
| 1 | -4.323304000 | -2.454118000 | -2.675132000 |
| 1 | -6.228243000 | -3.951091000 | -2.005576000 |
| 1 | -4.771503000 | -4.385421000 | -1.080681000 |
| 1 | -6.048050000 | -3.446415000 | -0.309810000 |
